## ***Pulsed and Continuous Radiofrequency Current Adjacent to the Cervical Dorsal Root Ganglion of the Rat Induces Late Cellular Activity in the Dorsal Horn***

Jan Van Zundert, M.D.,\* Anton J. A. de Louw, M.D., Ph.D.,† Elbert A. J. Joosten, Ph.D.,\*‡ Alfons G. H. Kessels, M.Sc., M.D.,§ Wiel Honig,‡ Pieter J. W. C. Dederen,|| Jan G. Veening, Ph.D.,|| Johan S. H. Vles, M.D., Ph.D.,† Maarten van Kleef, M.D., Ph.D.\*

**Background:** Pulsed radiofrequency treatment has recently been described as a non-neurodestructive or minimally neurodestructive alternative to radiofrequency heat lesions. In clinical practice long-lasting results of pulsed radiofrequency treatment adjacent to the cervical dorsal root ganglion for the management of chronic radicular spinal pain have been reported without neurologic complications. However, the mode of action is unclear. An early (3 h) effect of pulsed radiofrequency as measured by an increase of c-Fos in the pain-processing neurons of the dorsal horn of rats has been described in the literature. This effect was not mediated by tissue heating. The authors investigated a possible late or long-term effect of three different radiofrequency modalities.

**Methods:** Cervical laminectomy was performed in 19 male Wistar rats. The cervical dorsal root ganglion was randomly exposed to one of the four interventions: sham, continuous radiofrequency current at 67 centigrades, or pulsed radiofrequency current for 120 s or 8 min. The animals were sacrificed and the spinal cord was prepared for c-Fos labeling 7 days after the intervention.

**Results:** The number of c-Fos immunoreactive cells in the dorsal horn was significantly increased in the three different radiofrequency modalities as compared with sham. No significant difference was demonstrated between the three active intervention groups.

**Conclusions:** The authors demonstrated a late neuronal activity in the dorsal horn after exposure of the cervical dorsal root ganglion to different radiofrequency modalities, which was not temperature dependent.

CERVICOBRACHIALGIA can be defined as a radicular pain originating from the cervical spine radiating from the neck beyond the elbow into the upper limb with

referral to a particular spinal segment. It is most commonly caused by an irritation of the segmental nerve as a result of cervical disc protrusion or spondylosis resulting in narrowing of the intervertebral foramen.<sup>1-3</sup> Radiofrequency heat lesions have been described as treatment for chronic cervical radicular spinal pain that is refractory to conservative therapy (pharmacological treatment, physiotherapy, transcutaneous electrical nerve stimulation).<sup>4-6</sup> The use of continuous radiofrequency treatment at 67°C adjacent to the dorsal root ganglion (DRG) for the management of cervicobrachial pain has been investigated in two randomized controlled trials<sup>5,6</sup>. Van Kleef *et al.*<sup>5</sup> compared the efficacy of radiofrequency at 67°C with sham intervention and found a significant reduction in pain intensity 8 weeks after the intervention. Slappendel *et al.*<sup>6</sup> found no difference in outcome when radiofrequency treatment with an electrode tip temperature of 40°C was used as compared with radiofrequency at 67°C.

The mode of action of radiofrequency was initially attributed to the thermocoagulation of nerve fibers,<sup>7</sup> but contradictory findings, notably that only transient sensory loss in the relevant dermatome is observed although the pain relief may be of much longer duration, gave rise to the hypothesis that temperature is not the only mechanism responsible for changes in pain transmission.<sup>4</sup> Moreover, the use of radiofrequency heat lesions adjacent to the DRG for the management of nonmalignant pain is becoming more controversial because of its potential neurodestructive nature. For that reason a non-destructive or minimally destructive technique would be more attractive.

A modified technique, pulsed radiofrequency (PRF)<sup>8</sup> treatment is developed whereby in 1 s two bursts of 20 ms each of an alternating current are delivered. The oscillating frequency of the alternating current is 500,000 Hz. During one cycle the "active" phase of 20 ms is followed by a silent period of 480 ms to allow for washout of the generated heat. The output is usually set at 45 volts, but if the electrode tip temperature exceeds 42°C, it is decreased to prevent cell damage. This temperature is selected based on the findings that necrosis in various soft tissue cell lines could only be induced by heating to greater than 43°C.<sup>9,10</sup> In clinical practice long-lasting effects after PRF treatment for both 120 s and 8 min has been reported in different indications.<sup>8,11-19</sup> In

This article is accompanied by an Editorial View. Please see: Richebé P, Rathmell JP, Brennan TJ: Immediate early genes after pulsed radiofrequency treatment: Neurobiology in need of clinical trials. ANESTHESIOLOGY 2005; 102:1-3.

\* Department of Anesthesiology and Pain Management, † Department of Neurology, ‡ Department of Neuroscience, § Department of Clinical Epidemiology and Medical Technology Assessment, University Hospital Maastricht, The Netherlands; || Department of Anatomy, University Medical Center Nijmegen, The Netherlands; # Department of Anesthesiology, Critical Care and Multidisciplinary Pain Center; Ziekenhuis Oost-Limburg, Genk, Belgium.

Received from the Department of Anesthesiology and Pain Management, University Hospital Maastricht, Maastricht, The Netherlands. Submitted for publication April 26, 2004. Accepted for publication September 13, 2004. Support was provided solely from institutional and/or departmental sources.

Address correspondence and reprint requests to Dr. Van Zundert: Huisdriesstraat 3, 3600 Genk, Belgium. Address electronic mail to: janvanzundert@pandora.be. Individual article reprints may be purchased through the Journal Web site, www.anesthesiology.org.

a recent clinical audit PRF treatment (120 s) adjacent to the cervical DRG in patients with chronic cervicobrachialgia or cervicogenic headache showed a short-term clinical success in 72% of the patients and a mean duration of pain relief of 9.2 months. The median duration of action determined by the Kaplan Meier curve, however, is only 3 months, indicating a wide variability in clinical response.<sup>14</sup> Because of the variability in outcome and the use of different treatment protocols in clinical practice, further research on the mode of action is required.<sup>20</sup>

Sluiter *et al.*,<sup>8</sup> suggested that the electric field rather than temperature induced changes in the nerve cells that were responsible for the pain relief observed in clinical practice. Exposure of cultured cells to an electric field is associated with up-regulation of the nonspecific intermediate-early gene marker, c-Fos, and also transcription of other, as yet unidentified, genes.<sup>21</sup> C-fos based functional anatomic mapping has been validated as a powerful technique to detect activated neurons.<sup>22</sup> Evidence is accumulating to suggest that changes in early gene expression within the nervous system signal long-term adaptation within particular neural pathways.<sup>23</sup>

In rats, exposure of the cervical DRG to PRF current showed an early significant increase in c-Fos-immunoreactive neurons in the superficial laminae I and II of the dorsal horn, 3 h after the procedure.<sup>24</sup> The late effect on the dorsal horn of PRF has not previously been studied. Also, although used routinely in the clinical setting, the effects of continuous radiofrequency (67°C) have not been investigated.

The aim of this study was to examine the late effect of different modes of radiofrequency current application (conventional radiofrequency 67°C, PRF during 120 s, and PRF during 8 min) adjacent to the cervical DRG in rats on the neuronal activity of the dorsal horn by identifying the inducible gene expression (c-Fos) 7 days after the intervention, a duration far beyond the normal window of c-Fos expression after an acute event.<sup>22,23</sup> This may enhance the understanding of the underlying mechanism of the reported clinical effect.

## Materials and Methods

### General Conditions

All studies were conducted following the ethical guidelines of the International Association for the Study of Pain<sup>25</sup> and approved by the Local Animal Care Ethics Committee, Maastricht, The Netherlands. Three-month-old male Wistar rats bred by Charles River Laboratories (Sulzfeld, Germany) (weight, 275–335 g) were used for the experiments. All animals were housed at the University of Maastricht facility for experimental animals in individual standard rodent cages with sawdust bedding and food and water *ad libitum*. The housing room was air conditioned with a 12 h:12 h light:dark cycle (lights

on at 7:00 AM). Animals were checked daily for general condition and complications.

### Surgical Procedure

Rats were anesthetized by an intraperitoneal injection of sodium pentobarbital (Sanofi, Maassluis, The Netherlands) solved at 60 mg/ml and administered to the rats in a dose of 60 mg/kg.

The abdomen and cervical regions were shaved and the rat placed on an induction pad connected to a radiofrequency generator (Radionics, Burlington, MA). After identifying the cervical vertebra prominence as a landmark, a cervical hemilaminectomy was performed at the C5 and C6 levels. The corresponding DRG on the right side was identified and a 100 mm 30-gauge Levin cordotomy electrode (Radionics, Burlington, MA) with a 2 mm uninsulated tip was introduced adjacent to the DRG using a micro-manipulator (Leitz, Wetzlar, Germany).

After verifying the impedance, an indicator of the type of tissue surrounding the electrode tip, electrical stimulation was started at a rate of 50 Hz and 2 Hz. The rat was observed for withdrawal reaction of the right forelimb (50 Hz threshold). If muscle contractions were observed in the corresponding levels the stimulation threshold (2 Hz threshold) was noted.

All animals were unilaterally treated at one DRG on the right side with one of the four treatment modalities listed below. The treatment options were selected at random.

### Treatment Groups

In group 1 (n = 4), the sham intervention group, the electrode was maintained in contact with the ganglion for 120 s, but no current was passed through the electrode. In group 2 (n = 5), the continuous radiofrequency group, the dorsal root ganglion was heated by continuous radiofrequency current and maintained at a temperature of 67°C for 60 s. In group 3 (n = 5), the pulsed radiofrequency 120 s group, the dorsal root ganglion was exposed to PRF for 120 s with a maximum temperature of 42°C. In group 4 (n = 5), the pulsed radiofrequency 8 min group, the dorsal root ganglion was exposed to PRF for 8 min with a maximum temperature of 42°C.

For all procedures impedance, temperature, ampere, voltage, and wattage were recorded at the start and the end of the intervention, if available. At the end of the treatment, the skin incision was closed with 3-0 silk sutures, and the animals were allowed to recover from anesthesia.

### Observation of the Animals

All animals were tested on the “grid walk” by an experienced observer who was unaware of the treatment (W.H.) within 48 h postoperatively and on the seventh day after intervention to observe potential treat-

ment influences on gait. In the grid walk test, a general evaluation of the sensory motor function of the forelimbs and hindlimbs, animals have to cross a 100-cm wire grid containing 40 × 40 mm holes. Footfalls (the inability to grasp a grid with one of the limbs resulting in a drop of the foot below the plane of the grid) were counted.<sup>26</sup>

#### *Tissue Preparation*

At postoperative day 7, the rats were deeply anesthetized by an intraperitoneal injection of sodium pentobarbital (Sanofi, Maassluis, The Netherlands 60 mg/kg) and perfused transcardially with a flush of Tyrode solution (pH 7.4) followed by phosphate-buffered 4% paraformaldehyde (pH 7.4). The total cervical spinal cord was dissected and postfixed in phosphate-buffered 4% paraformaldehyde overnight at 4°C. The spinal cord was then divided into parts comprising one segment each and embedded in 10% porcine gelatin. The gelatin cups were allowed to harden on ice for 1 h and postfixed in phosphate-buffered 4% paraformaldehyde for 2 h. The tissue was cryoprotected in 15% sucrose in Tris-buffered saline overnight at 4°C and frozen in a liquid nitrogen cooled bath with 2-methylbutane 99%. Subsequently, cryostat sections (30 μm) were cut (Leica CM3050; Cryostat, Wetzlar, Germany) and collected in 0.1M phosphate-buffered saline (PBS).

#### *Immunocytochemistry*

Sections were rinsed in 0.1 M PBS for 10 min, using the free-floating method. The following incubations have been carried out at room temperature. The sections were incubated with 0.3% hydrogen peroxide (against endogenous peroxidase) for 30 min in 0.1 M PBS and subsequently washed 3 times in 0.1M PBS during 20 min. A preincubation in 0.1 M PBS with 0.1% bovine serum albumin and 0.2% Triton-X-100 (PBS-BT) was carried out for 30 min before the overnight incubation with rabbit-anti-c-Fos (1:20 000) (Santa Cruz Biotechnology Inc. SC-052, Santa Cruz, CA) in 0.1 M PBS-BT. After rinsing 3 times with 0.1M PBS for 20 min, the sections were incubated with donkey-antirabbit immunoglobulin G biotin conjugated 1:1500 in 0.1M PBS-BT (Jackson ImmunoResearch Laboratories Inc., Westgrove, PA) for 90 min. Then after three washes in 0.1 M PBS, sections were incubated with Vector ABC-Elite (Vector Laboratories, Ltd., Burlingame, CA) (1:800 M in 0.1 M PBS-BT) for 90 min followed by a preincubation with Di-amino-benzidine-Ni solution without perhydrol for 10 min. Then sections were incubated with Di-amino-benzidine-Ni solution with perhydrol for exactly 10 min. Finally, sections were rinsed three times for 20 min in 0.1 M PBS and then mounted on gelatin-coated object glasses (0.5% gelatin + 0.05% potassium chrome (III) sulfate), dried overnight in the oven at 37°C. Slices are dehydrated in alcohol series and cleared in Xylol before mounting

them in Entellan. Omission of the primary antibody was used for negative controls. The slices received a code allowing blinded counting of c-Fos immunoreactive cells.

#### *Analysis*

Quantification of the number of c-Fos immunoreactive cells in the dorsal horn was performed for each animal in one section (30 μm) of the C5 and C6 levels, both ipsilateral and contralateral. Counting was done by a blinded and experienced investigator (W.H.). A second investigator (E.J.), also blinded to the origin of the slices, performed control counting of randomly selected preparations.

To describe the distribution of the c-Fos immunoreactive in the dorsal horn, the median was calculated for the sum of C5 and C6 at the ipsilateral and contralateral side for the four treatment groups. The sum of C5 and C6 were used for further analysis. Differences between the four study groups were compared using the Kruskal-Wallis test, and if this test was significant the sham group was pairwise compared with the active groups using the Mann-Whitney U test. Ipsilateral *versus* contralateral comparison of the number of c-Fos immunoreactive cells in the dorsal horn was analyzed by a Wilcoxon signed rank test. For all analyses significance was reached if  $P < 0.05$ .

## **Results**

A total of 19 rats were investigated, four in the sham and five in each active intervention group (radiofrequency at 67°C, PRF 120 s, and PRF 8 min). The sections of two rats could not be analyzed because they were not anatomically intact, thus not allowing the determination of the level and a correct count of the c-Fos immunoreactive cells. The results presented refer to the c-Fos immunoreactive counted cells in the sections of 17 animals. All data are shown in table 1. The preintervention details are not significantly different between the groups: weight ( $P = 0.99$ ), stimulation threshold at 50 Hz ( $P = 0.09$ ), at 2 Hz ( $P = 0.2$ ), and start impedance ( $P = 0.07$ ).

The animals did not show postoperative complications during the 7-day observation period.

All animals performed well on the grid walk, when tested within 48 h and 7 days post-intervention, indicating that the surgical intervention did not result in major sensory motor impairment of the forelimbs or hindlimbs. No aberrations in gait (footfalls), even with special attention to the right forelimb, were observed.

Quantification of c-Fos immunoreactive cells in the dorsal horn was performed for each animal at the C5 and C6 levels. To avoid double counting of cells, only one section of 30 μm was used per level. The number of cells

**Table 1. Animal pretreatment details, treatment parameters and number of c-Fos-IR cells**

| Rat   | Weight (g) | Group                         | Stimulation threshold 1.0 ms |      | Impedance ( $\Omega$ ) |      | Temperature ( $^{\circ}\text{C}$ ) |     | mAmp  |     | Volt  |     | Watt  |     | c-Fos-IR cells |      |             |
|-------|------------|-------------------------------|------------------------------|------|------------------------|------|------------------------------------|-----|-------|-----|-------|-----|-------|-----|----------------|------|-------------|
|       |            |                               | 50 Hz                        | 2 Hz | start                  | end  | start                              | end | start | end | start | end | start | end | start          | end  | ipsilateral |
| RF 2  | 317        | sham                          | 0.5                          | 0.6  | 1180                   | 1180 | 32                                 | 32  |       |     |       |     |       |     |                | 0    | 3           |
| RF 7  | 309        | sham                          | 0.3                          | 0.4  | 1930                   | 1930 | 30                                 | 30  | –     | –   | –     | –   | –     | –   | –              | 6    | 6           |
| RF 10 | 303        | sham                          | 0.85                         | 0.9  | 1340                   | 1340 | 32                                 | 32  | –     | –   | –     | –   | –     | –   | –              | 5    | 8           |
| RF 13 | 289        | sham                          | 0.45                         | 0.5  | 1480                   | 1480 | 33                                 | 33  | –     | –   | –     | –   | –     | –   | –              | 3    | 3           |
| RF 1  | 309        | RF 67 $^{\circ}\text{C}$ 60 s | 0.15                         | 0.19 | 628                    | 530  | 32                                 | 67  | 18    | 18  | 10    | 10  | 0.2   | 0.2 | –              | 9    | 9           |
| RF 4  | 279        | RF 67 $^{\circ}\text{C}$ 60 s | 0.3                          | 0.33 | 1620                   | 1090 | 31                                 | 67  | 0.8   | 0.8 | 14    | 14  | 0.1   | 0.1 | –              | 16   | 10          |
| RF 9  | 279        | RF 67 $^{\circ}\text{C}$ 60 s | 0.4                          | 0.45 | 950                    | 798  | 33                                 | 67  | 27    | 21  | 18    | 15  | 0.5   | 0.4 | –              | n.c. | n.c.        |
| RF 15 | 310        | RF 67 $^{\circ}\text{C}$ 60 s | 0.3                          | 0.4  | 1350                   | 945  | 31                                 | 67  | 15    | 12  | 15    | 15  | 0.1   | 0.1 | –              | 12   | 10          |
| RF 19 | 335        | RF 67 $^{\circ}\text{C}$ 60 s | 0.11                         | 0.12 | 1350                   | 1070 | 30                                 | 67  | 15    | 14  | 14    | 12  | 0.2   | 0.1 | –              | 43   | 18          |
| RF 3  | 310        | PRF 120 s                     | 0.5                          | 0.6  | 1180                   | 980  | 31                                 | 39  | 27    | 30  | 45    | 45  | –     | –   | –              | 37   | 33          |
| RF 6  | 308        | PRF 120 s                     | 0.3                          | 0.35 | 694                    | 580  | 29                                 | 42  | 62    | 69  | 45    | 45  | –     | –   | –              | 34   | 30          |
| RF 12 | 285        | PRF 120 s                     | 0.1                          | 0.13 | 922                    | 790  | 32                                 | 40  | 45    | 47  | 45    | 45  | –     | –   | –              | n.c. | n.c.        |
| RF 14 | 275        | PRF 120 s                     | 0.4                          | 0.43 | 1330                   | 1150 | 32                                 | 42  | 23    | 27  | 45    | 45  | –     | –   | –              | 18   | 21          |
| RF 17 | 332        | PRF 120 s                     | 0.5                          | 0.52 | 993                    | 855  | 32                                 | 42  | 30    | 32  | 45    | 45  | –     | –   | –              | 10   | 15          |
| RF 5  | 289        | PRF 8 min                     | 0.24                         | 0.3  | 740                    | 641  | 31                                 | 42  | 48    | 51  | 45    | 43  | –     | –   | –              | 7    | 9           |
| RF 8  | 297        | PRF 8 min                     | 0.12                         | 0.15 | 1070                   | 987  | 31                                 | 40  | 25    | 34  | 45    | 45  | –     | –   | –              | 46   | 12          |
| RF 11 | 308        | PRF 8 min                     | 0.15                         | 0.23 | 998                    | 765  | 32                                 | 41  | 43    | 59  | 45    | 45  | –     | –   | –              | 18   | 11          |
| RF 16 | 318        | PRF 8 min                     | 0.35                         | 0.35 | 1350                   | 1110 | 33                                 | 41  | 21    | 30  | 45    | 45  | –     | –   | –              | 44   | 4           |
| RF 18 | 294        | PRF 8 min                     | 0.15                         | 0.17 | 1100                   | 882  | 33                                 | 42  | 22    | 30  | 45    | 45  | –     | –   | –              | 32   | 39          |

The anatomical preparations of rat V9 and V12 could not be counted (n.c.).

c-Fos-IR = c-Fos immunoreactive; RF = radiofrequency; PRF = pulsed radiofrequency.

were added and presented per side in table 1. The number of c-Fos immunoreactive cells among the four study groups were significantly different for the ipsilateral side ( $P = 0.03$ ) and the contralateral side ( $P = 0.02$ ) (Kruskal-Wallis test). The animals that received a sham procedure showed a relatively low number of c-Fos immunoreactive cells. A significant increase in the number of c-Fos immunoreactive cells is observed in all sections of the animals that received active intervention as compared with sham operated animals ( $P < 0.05$ ) (Mann-Whitney U test) (table 2). The typical nuclear stained c-Fos cells were mainly localized in the dorsal horn as shown in figure 1. No c-Fos immunoreactive cells were observed in the ventral or intermediate gray matter zones of the spinal cord.

A few c-Fos immunoreactive cells were observed in lamina X, surrounding the central canal. Control incubations (absence of the primary antibody and using 0.1 M PBS-BT only) were negative (fig. 1). Inspection of c-Fos expression at other spinal segments than C5–C6 did not show a particular increase at those levels.

No statistically significant difference in the number of c-Fos immunoreactive cells was noted between the active intervention groups. No significant difference was reached for the comparison between the number of c-Fos immunoreactive cells between the ipsilateral and the contralateral sides for the combined data of all animals ( $P = 0.20$ ). Even for the c-Fos immunoreactive cell counts of only the animals that underwent active intervention, no significant difference was noted ( $P = 0.12$ ). There was, however, a trend towards a higher number of c-Fos immunoreactive cells on the ipsilateral side.

## Discussion

PRF has recently been introduced as a non-neurodestructive or minimally neurodestructive alternative to radiofrequency for the management of chronic pain.<sup>8</sup> The mode of action of radiofrequency is not yet clear. The selective effect of radiofrequency lesions on small A- $\delta$  and C fibers, followed by a delayed effect on fibers in

**Table 2. Median number (range) of c-Fos-IR cells and P values**

|                                  | Median number (range) of c-Fos-IR cells in C5/C6 |               |                    |               |
|----------------------------------|--------------------------------------------------|---------------|--------------------|---------------|
|                                  | Ipsilateral side                                 | P versus Sham | Contralateral side | P versus Sham |
| Sham (n = 4)                     | 5 (0–6)                                          | –             | 4.5 (3–8)          | –             |
| RF 67 $^{\circ}\text{C}$ (n = 4) | 16 (9–43)                                        | 0.02          | 10 (9–18)          | 0.02          |
| PRF 120 s (n = 4)                | 34 (10–37)                                       | 0.02          | 25.5 (15–33)       | 0.02          |
| PRF 8 min (n = 5)                | 38 (7–46)                                        | 0.01          | 11 (4–39)          | 0.049         |

c-Fos-IR = c-Fos-immunoreactive; RF = radiofrequency; PRF = pulsed radiofrequency.

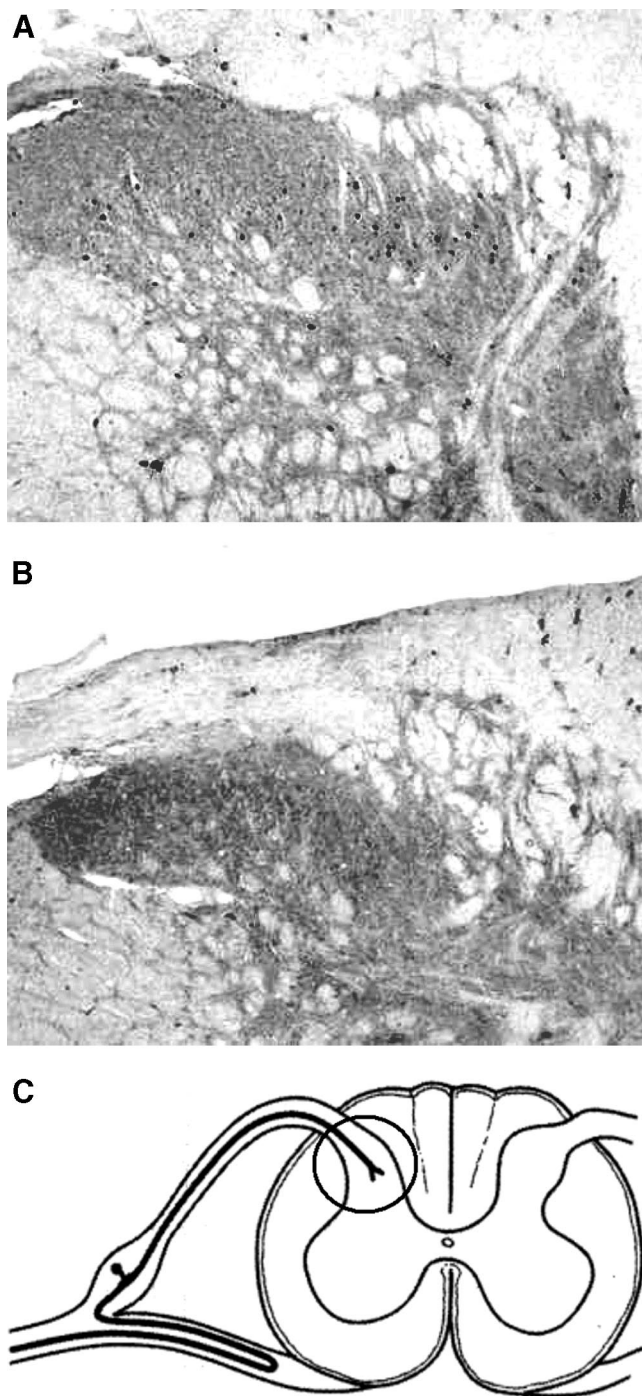

**Fig. 1.** Transverse sections of the cervical spinal cord at C5: nuclear c-Fos immunoreactive cells located in the dorsal horn of an animal treated with pulsed radiofrequency adjacent to the dorsal root ganglion (A) as compared with a sham operated animal (B). Schematic drawing of a transverse section of rat spinal cord at C5. The position of the area shown in A and B is indicated (C).

the A- $\alpha$  and  $\beta$  group, has been described in the cat.<sup>27</sup> Although a fiber-selective effect is suggested, other authors have described an “indiscriminate” effect on all types of peripheral fibers in the beagle dog.<sup>7</sup> Further-

more, radiofrequency at 67°C adjacent to the DRG of the goat produced proliferation of satellite cells and regeneration of damaged nerve fibers 2 weeks after the intervention, without microscopically observable signs of tissue damage (e.g., necrosis).<sup>28</sup> Considering the contradictory findings regarding the selectivity in nerve fiber destruction it is assumed that mechanisms other than thermocoagulation are also involved in its mode of action.

Because pain transmission is modulated in the dorsal gray matter, we investigated the late effect in the rat dorsal horn of continuous and pulsed (120 s and 8 min) radiofrequency current adjacent to the cervical DRG *versus* sham intervention. Our study results demonstrate a late or sustained effect of the three different radiofrequency current delivery modalities 7 days after the intervention. We observed a significant increase of c-Fos expression in the dorsal horn of animals that underwent active intervention compared with the sham-operated controls. An early increase in c-Fos immunoreactive cells in lamina I and II of the dorsal horn has been described after pulsed radiofrequency.<sup>24</sup> Here we demonstrated an additional late c-Fos activity with a bilateral response. Under basal conditions the detectable c-Fos concentrations are very low,<sup>29</sup> a finding that was confirmed in the sections of the sham-operated animals and also in sections from higher and lower segments of the spinal cord of animals from the active groups. After an acute challenge c-Fos proteins, nonspecific markers for cellular activity, are induced within a few minutes and the maximum concentrations occur between 1 and 3 h.<sup>22,30–35</sup> In addition another peak of c-Fos expression was seen within the deep layers, commencing at 8 h and peaking at 16 h. This second wave of labeling started ipsilaterally and spread to become bilateral.<sup>23</sup> For this reason we selected the time point of 7 days after the intervention to evaluate the late effect because it is far beyond the described window of c-Fos expression after an acute event. Our findings indicate no significant difference in neuronal activity in the dorsal horn of animals after radiofrequency and the modified technique PRF. These results further support our hypothesis that temperature is not an important factor for the obtained effect on c-Fos expression. In addition, Cahana *et al.*<sup>36</sup> demonstrated in a cell culture model that the acute effects of PRF are more reversible and less destructive than continuous radiofrequency even under nonthermal conditions.

It is well known that stimulation of central nervous system neurons with rectangular electrical pulses can induce immediate early gene expression, e.g., the inducible transcription factor c-Fos. These immediate early gene products are involved in triggering the long-term changes in gene expression that underlie neuronal plasticity.<sup>24</sup> Alterations in the genetic program of neurons underlie the central nervous system changes responsible for long-term potentiation and other phenomena.<sup>37</sup> Ran-

dic *et al.*<sup>38</sup> reported that brief high-frequency electrical stimulation of primary afferent fibers produced a long-term potentiation or long-term depression of fast monosynaptic and polysynaptic excitatory postsynaptic potentials in a high proportion of dorsal horn neurons. A distinct long-lasting modulation of synaptic efficiency can be induced at primary afferent synapses with neurons in the superficial laminae of the spinal dorsal horn by high-frequency stimulation of dorsal root afferents. These changes may be physiologically relevant for transmission and integration of sensory information. Furthermore, Sandkühler *et al.*<sup>39</sup> identified a robust long-term depression of synaptic transmission in substantia gelatinosa neurons that can be induced by low-frequency stimulation of primary afferent A- $\delta$  fibers, which may be relevant for long-lasting segmental antinociception after afferent stimulation. This is in accordance with our results, which indicate that PRF, delivered at 2 Hz during 120 s and 8 min, produced late changes in the dorsal horn. These changes may also contribute to the mode of action of the different radiofrequency techniques. Based on our experiments, we were not able to explain the difference in neuronal effects between radiofrequency and PRF. Further controlled experimental studies on the efficacy and safety of pulsed radiofrequency should be performed to establish the differential characteristics observed in clinical practice. Our observations on late bilateral c-Fos expression in the rat suggest that bilateral effects might be obtained in clinical practice. To our knowledge this has not been investigated. Further clinical research is needed to evaluate this potential bilateral response.

## Conclusions

Exposure of the cervical DRG to continuous radiofrequency (67°C) and PRF current induces increased cellular activity in the dorsal horn ipsilateral and contralateral 7 days after the intervention. The hereby demonstrated late and temperature-independent cellular activity in the rat spinal cord after application of different radiofrequency modalities is suggested to be part of the underlying mechanism during clinical use of pulsed radiofrequency.

The authors thank Marcel Durieux, M.D., Ph.D., Professor, Department of Anesthesiology, University of Virginia, Charlottesville, Virginia, and Robert Pearlstein, Ph.D., Associate Professor, Department of Neurosurgery/Anesthesiology, Duke University Medical Center, Durham, North Carolina, for their constructive remarks on the manuscript, and Nicole Van den Hecke, Administrative Research Coordinator, Multidisciplinary Pain Centre, Ziekenhuis Oost-Limburg, Genk, Belgium.

## References

- Sluijter ME, Koetsveld-Baart CC: Interruption of pain pathways in the treatment of the cervical syndrome. *Anaesthesia* 1980; 35:302-7
- Bland J: Cervical spine syndromes. *J Musculoskel Med* 1986; 3:23-41
- Merskey H, Bogduk N: Classification of Chronic Pain: Descriptions of Chronic Pain Syndromes and Definitions of Pain Terms. Seattle, IASP Press, 1994, pp 11-16
- van Kleef M, Spaans F, Dingemans W, Barendse GAM, Floor E, Sluijter ME: Effects and side effects of a percutaneous thermal lesion of the dorsal root ganglion in patients with cervical pain syndrome. *Pain* 1993; 52:49-53
- van Kleef M, Lousberg R, Liem L, Barendse G, Kessels F, Sluijter M: Radiofrequency lesion adjacent to the dorsal root ganglion for cervicobrachial pain: A prospective double blind randomized study. *Neurosurgery* 1996; 38:1127-32
- Slappendel R, Crul BJ, Braak GJJ, Geurts JW, Booij LHDJ, Voerman VF, de Boo T: The efficacy of radiofrequency lesioning of the cervical spinal dorsal root ganglion in a double blinded randomized study: No difference between 40 °C and 67 °C treatments. *Pain* 1997; 73:159-63
- Smith HP, McWhorter JM, Challa VR: Radiofrequency neurolysis in a clinical model: Neuropathological correlation. *J Neurosurg* 1981; 55:246-53
- Sluijter ME, Cosman ER, Rittman IIWB, van Kleef M: The effects of pulsed radiofrequency field applied to the dorsal root ganglion: A preliminary report. *Pain Clinic* 1998; 11:109-17
- Yonezawa M, Otsuka T, Matsui N, Tsuji H, Kato KH, Moriyama A, Kato T: Hyperthermia induces apoptosis in malignant fibrous histiocytoma cells *in vitro*. *Int J Cancer* 1996; 66:347-51
- Hildebrandt B, Wust P, Ahlers O, Dieing A, Sreenivasa G, Kerner T, Felix R, Riess H: The cellular and molecular basis of hyperthermia. *Crit Rev Oncol Hematol* 2002; 43:33-56
- Munglani R: The longer term effect of pulsed radiofrequency for neuropathic pain. *Pain* 1999; 80:437-9
- Van Zundert J, Brabant S, Van de Kelft E, Verduyssen A, Van Buyten JP: Pulsed radiofrequency treatment of the Gasserian ganglion in patients with idiopathic trigeminal neuralgia. *Pain* 2003; 104:449-52
- Mikeladze G, Espinal R, Finnegan R, Routon J, Martin D: Pulsed radiofrequency application in treatment of chronic zygapophysal joint pain. *Spine J* 2003; 3:360-2
- Van Zundert J, Lamé IE, de Louw A, Jansen J, Kessels F, Pattijn J, van Kleef M: Percutaneous Pulsed Radiofrequency Treatment of the Cervical Dorsal Root Ganglion in the Treatment of Chronic Cervical Pain Syndromes: A Clinical Audit. *Neuromodulation* 2003; 6:6-14
- Padfield N: Pulsed radiofrequency treatment, a novel form of "on-off" neuromodulation, 6th INS World Congress (abstract). Madrid, International Neuromodulation Society, 2003, p 68
- Padfield N: Pulsed radiofrequency treatment to the C2 and C3 dorsal root ganglia in refractory occipital neuralgia, a reliable alternative to peripheral nerve stimulation? 6th INS World Congress (abstract). Madrid, International Neuromodulation Society, 2003, p 68
- Gofeld M: Pulsed radiofrequency treatment of intractable meralgia paresthetica: Case study, 6th INS World Congress (abstract). Madrid, International Neuromodulation Society, 2003, p 58
- Ahadian FM: Pulsed radiofrequency neurotomy: Advances in pain medicine. *Curr Pain Headache Rep* 2004; 8:34-40
- Cohen SP, Foster A: Pulsed radiofrequency as a treatment for groin pain and orchialgia. *Urology* 2003; 61:645xxi-645xxiii.
- Abejon D, Reig E: Is Pulsed radiofrequency a neuromodulation technique? *Neuromodulation* 2003; 6:1-3
- Archer S, Li TT, Evans AT, Britland ST, Morgan H: Cell reactions to dielectrophoretic manipulation. *Biochem Biophys Res Comm* 1999; 257:687-98
- Kovacs KJ: c-Fos as a transcription factor: A stressful (re)view from a functional map. *Neurochem Int* 1998; 33:287-97
- Munglani R, Hunt SP: Proto-oncogenes: basic concepts and stimulation induced changes in the spinal cord. *Prog Brain Res* 1995; 104:283-98
- Higuchi Y, Nashold BS, Sluijter ME, Cosman E, Pearlstein RD: Exposure of the dorsal root ganglion in rats to pulsed radiofrequency currents activates dorsal horn lamina I and II neurons. *Neurosurgery* 2002; 50:850-6
- Zimmermann M: Ethical guidelines for investigation of experimental pain in conscious animals. *Pain* 1983; 16:109-10
- Houweling DA, Lankhorst AJ, Gispens WH, Bar PR, Joosten EA: Collagen containing neurotrophin-3 (NT-3) attracts regrowing injured corticospinal axons in the adult rat spinal cord and promotes partial functional recovery. *Exp Neurol* 1998; 153:49-59
- Letcher FS, Goldring S: The effect of radiofrequency current and heat on peripheral nerve action potential in the cat. *J Neurosurg* 1968; 29:42-7
- de Louw AJA, Vles HSH, Freling G, Herpers MJHM, Arends JW, van Kleef M: The morphological effects of radiofrequency lesion adjacent to the dorsal root ganglion (RF-DRG): An experimental study in the goat. *Eur J Pain* 2001; 5:169-74
- Hughes P, Lawlor P, Dragunow M: Basal expression of Fos, Fos-related, Jun, and Krox 24 proteins in rat hippocampus. *Brain Res Mol Brain Res* 1992; 13:355-7
- Kovacs KJ, Sawchenko PE: Sequence of stress-induced alterations in indices of synaptic and transcriptional activation in parvocellular neurosecretory neurons. *J Neurosci* 1996; 16:262-273
- Sonnenberg JL, Macgregor-Leon PF, Curran T, Morgan JI: Dynamic alterations occur in the levels and composition of transcription factor AP-1 complexes after seizure. *Neuron* 1989; 3:359-65
- Imaki T, Shibasaki T, Hotta M, Demura H: Intracerebroventricular administration of corticotropin-releasing factor induces c-fos mRNA expression in brain

regions related to stress responses: Comparison with pattern of c-fos mRNA induction after stress. *Brain Res* 1993; 616:114-25

33. Chan RK, Brown ER, Ericsson A, Kovacs KJ, Sawchenko PE: A comparison of two immediate-early genes, c-fos and NGFI-B, as markers for functional activation in stress-related neuroendocrine circuitry. *J Neurosci* 1993; 13:5126-38

34. Ding JM, Carver WC, Terracio L, Buggy J: Proto-oncogene c-fos and the regulation of vasopressin gene expression during dehydration. *Brain Res Mol Brain Res* 1994; 21:247-55

35. Cullinan WE, Herman JP, Battaglia DF, Akil H, Watson SJ: Pattern and time course of immediate early gene expression in rat brain following acute stress. *Neuroscience* 1995; 64:477-505

36. Cahana A, Vutskits L, Muller D: Acute differential modulation of synaptic

transmission and cell survival during exposure to pulsed and continuous radio-frequency energy. *J Pain* 2003; 4:197-202

37. Hughes PE, Alexi T, Walton M, Williams CE, Dragunow M, Clark RG, Gluckman PD: Activity and injury-dependent expression of inducible transcription factors, growth factors and apoptosis-related genes within the central nervous system. *Prog Neurobiol* 1999; 57:421-50

38. Randic M, Jiang MC, Cerne R: Long-term potentiation and long-term depression of primary afferent neurotransmission in the rat spinal cord. *J Neurosci* 1993; 13:5228-41

39. Sandkühler J, Chen JG, Cheng G, Randic M: Low-frequency stimulation of afferent A $\delta$ -fibers induces long-term depression at primary afferent synapses with Substantia gelatinosa neurons in the rat. *J Neurosci* 1997; 17:6483-91
